# Supplementary material for: Disease characteristics and causes of early and late death in a group of Croatian patients with systemic lupus erythematosus deceased over a 10-year period
Source: PubMed Central journal article supplement (PMC5833101; doi:10.3325/cmj.2018.59.3), 2018-02
Supplement: CroatMedJ_59_s001.pdf [file CroatMedJ_59_s001.pdf]

Supplementary material 1. A. Frequency of the American College of Rheumatology (ACR) criteria at death (cumulatively) and comparison of the frequencies between early and late death

| ACR criterion (at death)      | All (N=90) | %  | p                             |                              | p                              |                               |    |       |
|-------------------------------|------------|----|-------------------------------|------------------------------|--------------------------------|-------------------------------|----|-------|
|                               |            |    | Early death (<5 years) (n=21) | Late death (≥5 years) (n=69) | Early death (<10 years) (n=43) | Late death (≥10 years) (n=47) |    |       |
| Malar rash                    | 46         | 51 | 6                             | 40                           | 0,018                          | 17                            | 29 | 0,036 |
| Discoid rash                  | 22         | 24 | 9                             | 13                           | 0,025                          | 14                            | 8  | 0,087 |
| Photosensitivity              | 34         | 38 | 6                             | 28                           | 0,320                          | 14                            | 20 | 0,329 |
| Oral ulcers                   | 11         | 12 | 4                             | 7                            | 0,275                          | 10                            | 1  | 0,002 |
| Nonerosive arthritis          | 63         | 70 | 11                            | 52                           | 0,044                          | 29                            | 34 | 0,613 |
| Serositis                     | 33         | 37 | 7                             | 26                           | 0,717                          | 13                            | 20 | 0,226 |
| a) Pleuritis                  | 27         | 30 | 6                             | 21                           | 0,870                          | 12                            | 15 | 0,679 |
| b) Pericarditis               | 17         | 19 | 4                             | 3                            | 1,000                          | 6                             | 11 | 0,253 |
| Renal disorder                | 49         | 54 | 9                             | 40                           | 0,223                          | 20                            | 29 | 0,148 |
| a) Persistent proteinuria     | 40         | 44 | 8                             | 32                           | 0,504                          | 16                            | 24 | 0,186 |
| b) Cellular casts             | 40         | 44 | 8                             | 32                           | 0,504                          | 18                            | 22 | 0,637 |
| Neurologic disorder           | 11         | 12 | 3                             | 8                            | 0,714                          | 6                             | 5  | 0,632 |
| a) Seizures                   | 8          | 9  | 1                             | 7                            | 0,673                          | 3                             | 5  | 0,716 |
| b) Psychosis                  | 4          | 4  | 2                             | 2                            | 0,231                          | 3                             | 1  | 0,345 |
| Hematologic disorder          | 75         | 83 | 16                            | 59                           | 0,328                          | 31                            | 44 | 0,006 |
| a) Hemolytic anemia           | 11         | 12 | 5                             | 6                            | 0,120                          | 8                             | 3  | 0,077 |
| b) Leukopenia                 | 44         | 49 | 10                            | 34                           | 0,894                          | 20                            | 24 | 0,666 |
| c) Lymphopenia                | 58         | 64 | 14                            | 44                           | 0,808                          | 26                            | 32 | 0,451 |
| d) Thrombocytopenia           | 26         | 29 | 7                             | 19                           | 0,608                          | 12                            | 14 | 0,844 |
| Immunologic disorder          | 83         | 92 | 17                            | 66                           | 0,049                          | 38                            | 45 | 0,252 |
| a) anti-dsDNA antibodies      | 71         | 79 | 12                            | 59                           | 0,012                          | 32                            | 39 | 0,320 |
| b) anti-Smith antibodies      | 12         | 13 | 3                             | 9                            | 1,000                          | 6                             | 6  | 0,869 |
| c) anticardiolipin antibodies | 46         | 51 | 9                             | 37                           | 0,388                          | 20                            | 26 | 0,404 |
| d) lupus anticoagulant        | 13         | 14 | 3                             | 10                           | 1,000                          | 6                             | 7  | 0,899 |
| Antinuclear antibodies        | 86         | 96 | 20                            | 66                           | 1,000                          | 41                            | 45 | 1,000 |

P<0.002 considered statistically significant, after adjustment for multiple comparisons

Supplementary material 1. B. Frequency of the American College of Rheumatology (ACR) criteria at diagnosis and comparison of the frequencies between early and late death

| ACR criterion (at diagnosis)  | All (N=73) | %  | Early death<br>( $<5$ years)<br>(n=21) | Late death<br>( $\geq 5$ years)<br>(n=52) | p     | Early death<br>( $<10$ years)<br>(n=43) | Late death<br>( $\geq 10$ years)<br>(n=30) | p     |
|-------------------------------|------------|----|----------------------------------------|-------------------------------------------|-------|-----------------------------------------|--------------------------------------------|-------|
| Malar rash                    | 24         | 33 | 4                                      | 20                                        | 0,110 | 12                                      | 12                                         | 0,279 |
| Discoid rash                  | 16         | 22 | 9                                      | 7                                         | 0,011 | 12                                      | 4                                          | 0,139 |
| Photosensitivity              | 16         | 22 | 5                                      | 11                                        | 0,765 | 9                                       | 7                                          | 0,807 |
| Oral ulcers                   | 5          | 7  | 3                                      | 2                                         | 0,140 | 5                                       | 0                                          | 0,074 |
| Nonerosive arthritis          | 47         | 64 | 11                                     | 36                                        | 0,174 | 28                                      | 19                                         | 0,876 |
| Serositis                     | 15         | 21 | 7                                      | 8                                         | 0,112 | 10                                      | 5                                          | 0,493 |
| a) Pleuritis                  | 14         | 19 | 6                                      | 8                                         | 0,207 | 9                                       | 5                                          | 0,649 |
| b) Pericarditis               | 6          | 8  | 4                                      | 2                                         | 0,053 | 5                                       | 1                                          | 0,390 |
| Renal disorder                | 23         | 32 | 9                                      | 14                                        | 0,185 | 16                                      | 7                                          | 0,209 |
| a) Persistent proteinuria     | 18         | 25 | 7                                      | 11                                        | 0,274 | 12                                      | 6                                          | 0,441 |
| b) Cellular casts             | 17         | 23 | 6                                      | 11                                        | 0,547 | 12                                      | 5                                          | 0,264 |
| Neurologic disorder           | 6          | 8  | 3                                      | 3                                         | 0,345 | 5                                       | 1                                          | 0,390 |
| a) Seizures                   | 3          | 4  | 1                                      | 2                                         | 1,000 | 2                                       | 1                                          | 1,000 |
| b) Psychosis                  | 3          | 4  | 2                                      | 1                                         | 0,197 | 3                                       | 0                                          | 0,264 |
| Hematologic disorder          | 34         | 47 | 13                                     | 21                                        | 0,095 | 22                                      | 12                                         | 0,347 |
| a) Hemolytic anemia           | 4          | 5  | 1                                      | 3                                         | 1,000 | 3                                       | 1                                          | 0,639 |
| b) Leukopenia                 | 22         | 30 | 7                                      | 15                                        | 0,705 | 14                                      | 8                                          | 0,589 |
| c) Lymphopenia                | 20         | 27 | 10                                     | 10                                        | 0,014 | 17                                      | 3                                          | 0,005 |
| d) Thrombocytopenia           | 9          | 12 | 4                                      | 5                                         | 0,269 | 7                                       | 2                                          | 0,292 |
| Immunologic disorder          | 46         | 63 | 14                                     | 32                                        | 0,681 | 32                                      | 14                                         | 0,016 |
| a) anti-dsDNA antibodies      | 38         | 52 | 10                                     | 28                                        | 0,630 | 28                                      | 10                                         | 0,008 |
| b) anti-Smith antibodies      | 1          | 1  | 1                                      | 0                                         | 0,288 | 1                                       | 0                                          | 1,000 |
| c) anticardiolipin antibodies | 11         | 15 | 6                                      | 5                                         | 0,067 | 10                                      | 1                                          | 0,022 |
| d) lupus anticoagulant        | 4          | 5  | 3                                      | 1                                         | 0,069 | 3                                       | 1                                          | 0,639 |
| Antinuclear antibodies        | 63         | 86 | 19                                     | 44                                        | 0,714 | 40                                      | 23                                         | 0,080 |

P<0.002 considered statistically significant, after adjustment for multiple comparisons
